# Supplementary material
Source: PubMed Central journal article supplement (PMC1304284)
Supplement: biophysj_86_6_3828__1.pdf [file biophysj_86_6_3828__1.pdf]

**TABLE S1 Temperature coefficients of NH resonances**

| Peptide   | Sequence      | $-\text{d}\delta / \text{d}T$ (ppb/deg) |                  |                  |                  |                  |
|-----------|---------------|-----------------------------------------|------------------|------------------|------------------|------------------|
|           |               | Xaa <sup>2</sup>                        | Xaa <sup>3</sup> | Xaa <sup>4</sup> | Xaa <sup>5</sup> | Xaa <sup>6</sup> |
| <b>2a</b> | c[D-PWTFFpY]  | 8.9                                     | 4.3              | 9.0              | 7.6              | 2.5              |
| <b>2b</b> | c[D-PWTpYFF]  | 9.6                                     | 4.5              | 9.0              | 8.0              | 2.0              |
| <b>3</b>  | c[D-PpYWTFF]  | 10.5                                    | 2.4              | 6.4              | 10.1             | 3.5              |
| <b>4a</b> | c[D-PpYTFFF]  | 9.3                                     | 4.4              | 9.6              |                  | 1.5              |
| <b>4b</b> | c[D-PpYFWFT]  | 10.5                                    | 4.5              | 9.9              | 9.0              | 0.5              |
| <b>5*</b> | c[D-PpYTFFWF] | 8.7                                     | 3.9              | 5.5              | 4.6              | 0.9              |
| <b>6</b>  | c[D-PpYTFFW]  | 11.4                                    | 4.4              | 9.5              | 9.4              | 3.6              |

\* Adams et al., 2002.

**TABLE S2 Coupling constants and  $\chi_1$  rotamer populations, 5 °C**

| Residue                 | $^3J_{H_{\alpha}-H_{\beta r}}$<br>(Hz) | $^3J_{H_{\alpha}-H_{\beta s}}$<br>(Hz) | pI   | Major<br>rotamer     | pII  | pIII  |
|-------------------------|----------------------------------------|----------------------------------------|------|----------------------|------|-------|
| <b>c[D-PWTFFPY], 2a</b> |                                        |                                        |      |                      |      |       |
| D-Pro <sup>1</sup>      |                                        |                                        |      |                      |      |       |
| Trp <sup>2</sup>        | 9.1                                    | 4.3                                    | 0.59 | $\chi_1 = -60^\circ$ | 0.25 | 0.16  |
| Thr <sup>3</sup>        | 3.7                                    |                                        |      |                      |      |       |
| Phe <sup>4</sup>        | 8.7                                    | 7.0                                    | 0.56 | $\chi_1 = 180^\circ$ | 0.40 | 0.04  |
| Phe <sup>5</sup>        | 10.8                                   | 4.8                                    | 0.74 | $\chi_1 = -60^\circ$ | 0.20 | 0.06  |
| pTyr <sup>6</sup>       | 8.5                                    | 4.8                                    | 0.54 | $\chi_1 = -60^\circ$ | 0.26 | 0.20  |
| <b>c[D-PWTpYFF], 2b</b> |                                        |                                        |      |                      |      |       |
| D-Pro <sup>1</sup>      |                                        |                                        |      |                      |      |       |
| Trp <sup>2</sup>        | 8.8                                    | 4.6                                    | 0.57 | $\chi_1 = -60^\circ$ | 0.25 | 0.18  |
| Thr <sup>3</sup>        | 3.0                                    |                                        |      |                      |      |       |
| pTyr <sup>4</sup>       | 8.3                                    | 7.3                                    | 0.52 | $\chi_1 = 180^\circ$ | 0.43 | 0.05  |
| Phe <sup>5*</sup>       | 10.0                                   | 4.9                                    | 0.67 |                      | 0.21 | 0.12  |
| Phe <sup>6*</sup>       | 8.6                                    | 5.0                                    | 0.55 |                      | 0.23 | 0.22  |
| <b>c[D-PpYWTF], 3</b>   |                                        |                                        |      |                      |      |       |
| D-Pro <sup>1</sup>      |                                        |                                        |      |                      |      |       |
| pTyr <sup>2</sup>       | 9.2                                    | 5.4                                    | 0.60 | $\chi_1 = -60^\circ$ | 0.26 | 0.14  |
| Trp <sup>3</sup>        | 4.9                                    | 11.7                                   | 0.83 | $\chi_1 = -60^\circ$ | 0.21 | -0.04 |
| Thr <sup>4</sup>        | 6.8                                    |                                        |      |                      |      |       |
| Phe <sup>5</sup>        | 8.7                                    | 4.9                                    | 0.56 | $\chi_1 = -60^\circ$ | 0.23 | 0.21  |
| Phe <sup>6*</sup>       | 8.8                                    | 5.4                                    | 0.57 |                      | 0.25 | 0.18  |
| <b>c[D-PpYTWFF], 4a</b> |                                        |                                        |      |                      |      |       |

|                    |      |     |      |                      |      |      |
|--------------------|------|-----|------|----------------------|------|------|
| D-Pro <sup>1</sup> |      |     |      |                      |      |      |
| pTyr <sup>2</sup>  | 10.3 | 4.3 | 0.70 | $\chi_1 = -60^\circ$ | 0.16 | 0.14 |
| Thr <sup>3</sup>   |      |     |      |                      |      |      |
| Trp <sup>4*</sup>  | 6.4  | 5.8 | 0.36 |                      | 0.34 | 0.30 |
| Phe <sup>5*</sup>  | 7.8  | 6.8 | 0.47 |                      | 0.39 | 0.14 |
| Phe <sup>6*</sup>  | 9.6  | 4.9 | 0.64 |                      | 0.21 | 0.15 |

c[D-PPYFWFT], **4b**

|                    |      |     |      |                      |      |       |
|--------------------|------|-----|------|----------------------|------|-------|
| D-Pro <sup>1</sup> |      |     |      |                      |      |       |
| pTyr <sup>2</sup>  | 11.3 | 4.4 | 0.79 | $\chi_1 = -60^\circ$ | 0.16 | 0.05  |
| Phe <sup>3</sup>   | 11.2 | 5.4 | 0.79 | $\chi_1 = -60^\circ$ | 0.25 | -0.04 |
| Trp <sup>4</sup>   | 6.3  | 7.3 | 0.43 | $\chi_1 = -60^\circ$ | 0.34 | 0.23  |
| Phe <sup>5</sup>   | 7.3  | 5.9 | 0.43 | $\chi_1 = -60^\circ$ | 0.30 | 0.27  |
| Thr <sup>6</sup>   | 3.9  |     |      |                      |      |       |

c[D-PPYTFFW], **5**

|                    |      |     |      |                      |      |      |
|--------------------|------|-----|------|----------------------|------|------|
| D-Pro <sup>1</sup> |      |     |      |                      |      |      |
| pTyr <sup>2</sup>  | 10.7 | 4.8 | 0.74 | $\chi_1 = -60^\circ$ | 0.20 | 0.06 |
| Thr <sup>3</sup>   |      |     |      |                      |      |      |
| Phe <sup>4</sup>   | 6.8  | 7.9 | 0.48 | $\chi_1 = 180^\circ$ | 0.38 | 0.06 |
| Trp <sup>5</sup>   | 10.4 | 4.2 | 0.72 | $\chi_1 = -60^\circ$ | 0.14 | 0.14 |
| Phe <sup>6</sup>   | 8.8  | 4.9 | 0.57 | $\chi_1 = 180^\circ$ | 0.22 | 0.21 |

c[D-PPYTFFW], **6**

|                    |      |     |      |                      |      |      |
|--------------------|------|-----|------|----------------------|------|------|
| D-Pro <sup>1</sup> |      |     |      |                      |      |      |
| pTyr <sup>2</sup>  | 10.7 | 4.0 | 0.74 | $\chi_1 = -60^\circ$ | 0.14 | 0.12 |
| Thr <sup>3</sup>   | 3.8  |     |      |                      |      |      |

|                  |      |     |      |                      |      |      |
|------------------|------|-----|------|----------------------|------|------|
| Phe <sup>4</sup> | 6.8  | 8.8 | 0.56 | $\chi_1 = 180^\circ$ | 0.39 | 0.05 |
| Phe <sup>5</sup> | 10.7 | 4.9 | 0.73 | $\chi_1 = -60^\circ$ | 0.21 | 0.06 |
| Trp <sup>6</sup> | 8.8  | 4.0 | 0.57 | $\chi_1 = 180^\circ$ | 0.30 | 0.13 |

---

\* Stereospecificity unresolved.
